# Supplementary material for: Thermo-regulating effect of Al–Si microencapsulated phase change material-based catalyst support on ammonia decomposition
Source: Royal Society of Chemistry journal article supplement (doi:10.1039/d4re00380b), 2024-12-10
Supplement: d4re00380b1.pdf [file d4re00380b1.pdf]

## Thermo-regulating Effect of Al–Si Microencapsulated Phase Change

### Material-based Catalyst Support on Ammonia Decomposition

#### Supplementary Data

##### 1. Reaction performance

The reactor output gas flows were measured during the cooling process for various catalysts. A decrease in the temperature of the endothermic reaction decreases the conversion, resulting in an increase in the output reactant ( $\text{NH}_3$ ) and a decrease in the output products ( $\text{H}_2$  and  $\text{N}_2$ ), as shown in Figure S1.

—:  $\text{H}_2$  – solid core    —:  $\text{NH}_3$  – solid core    —:  $\text{N}_2$  – solid core  
—:  $\text{H}_2$  – liquid core    —:  $\text{NH}_3$  – liquid core    —:  $\text{N}_2$  – liquid core

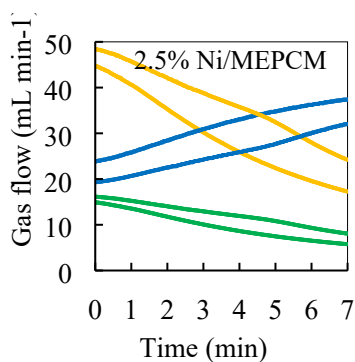

(a)

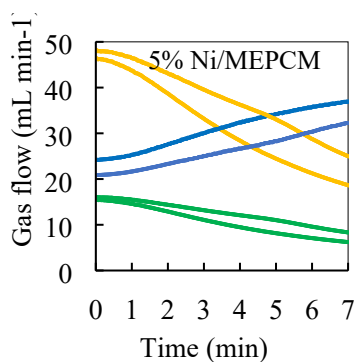

(b)

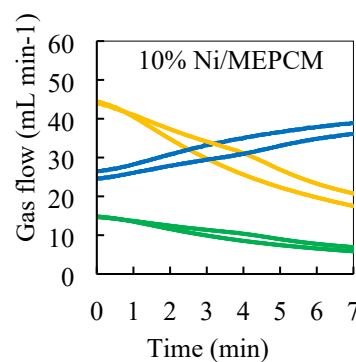

(c)

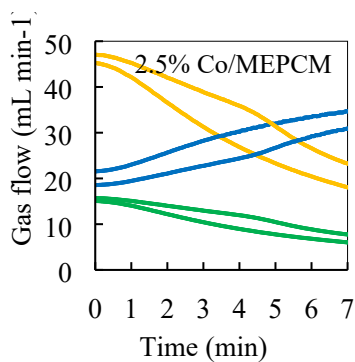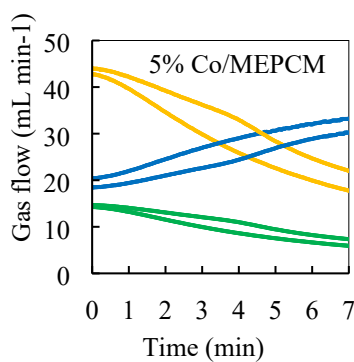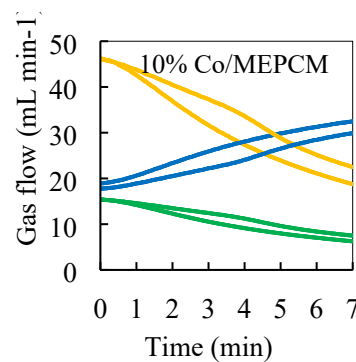

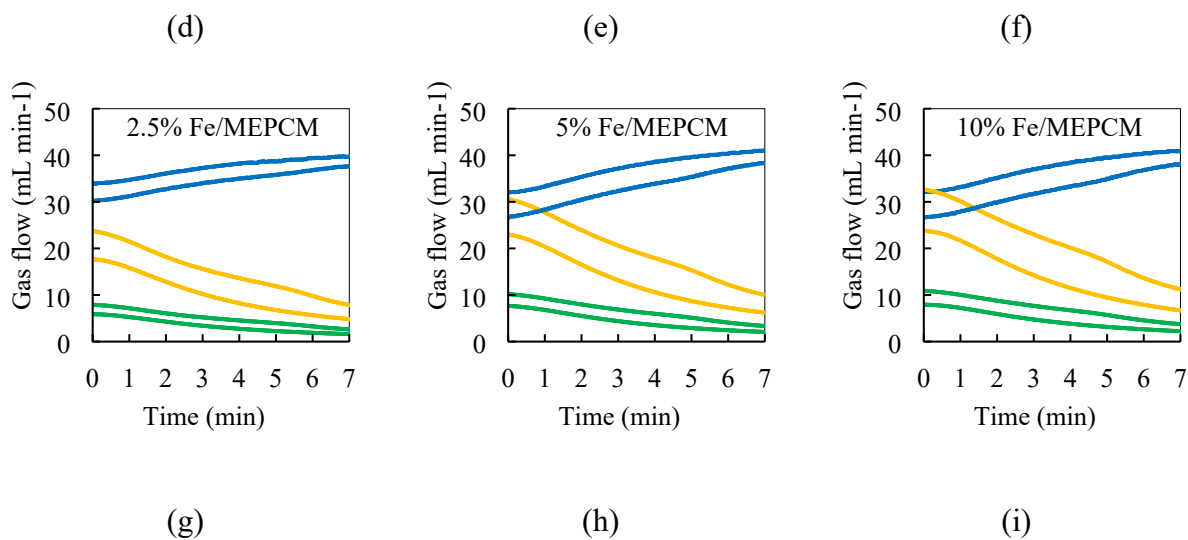

Figure S1. Output flow rate of gases during reactor cooling from 570 to 500 °C with different MEPCM catalysts.

## 2. Heat balance

The calculation of heat balance on the MEPCM catalyst system during transient cooling process described as follows:

### a. Latent heat release

$$\lambda_{(t)} = \sum_{i=t_0}^{i=t} \lambda_{(i)}$$

| Time (min) | Latent heat release (J/min)                           |
|------------|-------------------------------------------------------|
| 1          | 0.134398923                                           |
| 2          | 0.965228629                                           |
| 3          | 3.970877272                                           |
| 4          | 9.233816917                                           |
| 5          | 12.23335652                                           |
| 6          | 9.233816917                                           |
| 7          | 3.970877272                                           |
| 8          | 0.965228629                                           |
| 9          | 0.134398923                                           |
|            |                                                       |
| Total      | 40.842 (for 0.2 g catalyst, released over 9 minutes). |

### b. Reaction enthalpy

$$r\Delta H_{r,NH_3} = \frac{P(V_{in} - V_{out})}{RT} \Delta H_{r,NH_3}$$

| Time (min) | NH <sub>3</sub> flow in (mL/min) | NH <sub>3</sub> flow out (mL/min) | Sample temperature (K) | NH <sub>3</sub> reacted (mol/min) | Reaction enthalpy absorption (J/min) |
|------------|----------------------------------|-----------------------------------|------------------------|-----------------------------------|--------------------------------------|
| 1          | 50                               | 26                                | 840.1                  | 0.000348391                       | -32.20522528                         |
| 2          | 50                               | 27.9                              | 833                    | 0.000323544                       | -29.90841215                         |
| 3          | 50                               | 29.4                              | 826.9                  | 0.000303809                       | -28.0840872                          |
| 4          | 50                               | 31                                | 820.9                  | 0.00028226                        | -26.09212375                         |
| 5          | 50                               | 33.1                              | 816.3                  | 0.000252478                       | -23.33904023                         |
| 6          | 50                               | 34.8                              | 810.4                  | 0.000228734                       | -21.14415043                         |
| 7          | 50                               | 36.1                              | 800                    | 0.00021189                        | -19.58713415                         |
| 8          | 50                               | 37.5                              | 792.5                  | 0.000192352                       | -17.78102639                         |
| 9          | 50                               | 38.5                              | 786.6                  | 0.000178291                       | -16.48124376                         |

c. Flow enthalpy in

$$H_{gas,in} = \sum mC_p(T - T_{ref})$$

|                    |              |
|--------------------|--------------|
| Cp NH <sub>3</sub> | 42.3 J/mol.K |
| Cp Ar              | 20.8 J/mol.K |

| Time (min) | Inlet temperature (K) | NH <sub>3</sub> flow in (mol/min) | Ar flow in (mol/min) | Enthalpy gas in (J/min) |
|------------|-----------------------|-----------------------------------|----------------------|-------------------------|
| 1          | 569.3                 | 0.000725814                       | 0.000725814          | 24.91487933             |
| 2          | 559.9                 | 0.000732                          | 0.000732             | 24.69329444             |
| 3          | 551.0                 | 0.0007374                         | 0.0007374            | 24.46156229             |
| 4          | 543.3                 | 0.00074279                        | 0.00074279           | 24.2796483              |
| 5          | 536.7                 | 0.000746975                       | 0.000746975          | 24.10555077             |
| 6          | 529.8                 | 0.000752414                       | 0.000752414          | 23.95363085             |
| 7          | 523.2                 | 0.000762195                       | 0.000762195          | 23.9477753              |
| 8          | 517.2                 | 0.000769408                       | 0.000769408          | 23.88326937             |
| 9          | 511.2                 | 0.000775179                       | 0.000775179          | 23.7690843              |

d. Flow enthalpy out

$$H_{gas,out} = \sum mC_p(T - T_{ref})$$

|                    |              |
|--------------------|--------------|
| Cp NH <sub>3</sub> | 42.3 J/mol.K |
| Cp Ar              | 20.8 J/mol.K |

|                   |               |
|-------------------|---------------|
| Cp H <sub>2</sub> | 28.8 J/mol.K  |
| Cp N <sub>2</sub> | 29.11 J/mol.K |

| Time (min) | Bottom temperature (K) | NH <sub>3</sub> flow out (mol/min) | H <sub>2</sub> flow out (mol/min) | N <sub>2</sub> flow out (mol/min) | Ar flow out (mol/min) | Enthalpy gas out (J/min) |
|------------|------------------------|------------------------------------|-----------------------------------|-----------------------------------|-----------------------|--------------------------|
| 1          | 565.3                  | 0.000377423                        | 0.000522586                       | 0.000174195                       | 0.000725814           | -27.65489066             |
| 2          | 555.9                  | 0.000408456                        | 0.000485316                       | 0.000161772                       | 0.000732              | -27.1760463              |
| 3          | 547.1                  | 0.000433591                        | 0.000455713                       | 0.000151904                       | 0.0007374             | -26.73825901             |
| 4          | 539.3                  | 0.00046053                         | 0.00042339                        | 0.00014113                        | 0.00074279            | -26.34655775             |
| 5          | 532.6                  | 0.000494498                        | 0.000378717                       | 0.000126239                       | 0.000746975           | -25.90766858             |
| 6          | 525.8                  | 0.00052368                         | 0.000343101                       | 0.000114367                       | 0.000752414           | -25.54266897             |
| 7          | 519.2                  | 0.000550305                        | 0.000317835                       | 0.000105945                       | 0.000762195           | -25.38163814             |
| 8          | 513.3                  | 0.000577056                        | 0.000288528                       | 9.6176E-05                        | 0.000769408           | -25.14744606             |
| 9          | 507.2                  | 0.000596888                        | 0.000267437                       | 8.91456E-05                       | 0.000775179           | -24.90859432             |

e. Sensible heat

$$mC_p \frac{dT}{dt} = (H_{gas,in} + \lambda_{(t)}) - (H_{gas,out} + r\Delta H_{r,NH_3})$$

| Time (min) | Sensible heat (J/min) |
|------------|-----------------------|
| 1          | -34.81083769          |
| 2          | -31.42593538          |
| 3          | -26.38990666          |
| 4          | -18.92521629          |
| 5          | -12.90780151          |
| 6          | -13.49937164          |
| 7          | -17.05011971          |
| 8          | -18.07997446          |
| 9          | -17.48635486          |
